# Supplementary material for: Association of BNT162b2 Vaccine Third Dose Receipt With Incidence of SARS-CoV-2 Infection, COVID-19–Related Hospitalization, and Death Among Residents of Long-term Care Facilities, August to October 2021
Source: PubMed Central journal article supplement (PMC9250055; doi:10.1001/jamanetworkopen.2022.19940), 2022-07-01
Supplement: jamanetwopen-e2219940-s001.pdf [file jamanetwopen-e2219940-s001.pdf]

## Supplemental Online Content

Muhsen K, Maimon N, Mizrahi AY, et al. Association of BNT162b2 vaccine third dose receipt with incidence of SARS-CoV-2 infection, COVID-19–related hospitalization, and death among residents of long-term care facilities, August to October 2021. *JAMA Netw Open.* 2022;5(7):e2219940.  
doi:10.1001/jamanetworkopen.2022.19940

**eTable 1.** Associations of BNT162b2 Vaccine Third Dose Vaccination and Other Co-Variates With SARS-CoV-2 Infection >7 Days Following Third Dose Administration

**eTable 2.** Associations of BNT162b2 Third Dose Vaccination With SARS-CoV-2 Infection, COVID-19 Hospitalizations, and Deaths >14 Days Following Vaccination Among Residents of Long-Term Care Facilities

This supplemental material has been provided by the authors to give readers additional information about their work.

**eTable 1: Associations of BNT162b2 Vaccine Third Dose Vaccination and Other Co-Variates With SARS-CoV-2 Infection >7 Days Following Third Dose Administration**

|                                          | Unadjusted HR<br>(95% CI) <sup>a</sup> | P-value <sup>a</sup> | Adjusted HR<br>(95% CI) <sup>c</sup> | P-value <sup>c</sup> |
|------------------------------------------|----------------------------------------|----------------------|--------------------------------------|----------------------|
| <b>BNT162b2 booster dose vaccination</b> |                                        |                      |                                      |                      |
| Two doses only <sup>b</sup>              | 1.00                                   | <.001                | 1.00                                 | <.001                |
| third dose vaccination > 7 days          | 0.10 (0.07, 0.15)                      |                      | 0.11 (0.07, 0.15)                    |                      |
| <b>Age, years</b>                        | 1.00 (0.98, 1.01)                      | 0.65                 | 1.00 (0.98, 1.02)                    | 0.99                 |
| <b>Sex</b>                               |                                        |                      |                                      |                      |
| Female                                   | 1.00                                   | 0.18                 | 1.00                                 | 0.05                 |
| Male                                     | 1.18 (0.92, 1.52)                      |                      | 1.29 (0.99, 1.68)                    |                      |
| <b>Residential socioeconomic status</b>  |                                        | 0.87                 |                                      | 0.72                 |
| Low                                      | 1.00                                   |                      | 1.00                                 |                      |
| Intermediate                             | 1.05 (0.69, 1.59)                      | 0.81                 | 1.07 (0.67, 1.71)                    | 0.76                 |
| High                                     | 0.96 (0.60, 1.51)                      | 0.86                 | 0.93 (0.56, 1.55)                    | 0.78                 |
| <b>Population group</b>                  |                                        | 0.76                 |                                      | 0.87                 |
| Arab population                          | 1.00                                   |                      | 1.00                                 |                      |
| General Jewish population                | 0.97 (0.33, 2.84)                      | 0.69                 | 1.10 (0.38, 3.16)                    | 0.85                 |
| Ultraorthodox Jewish population          | 1.21 (0.59, 2.51)                      | 0.59                 | 1.21 (0.57, 2.55)                    | 0.61                 |
| <b>Calendar epidemiological week</b>     | 0.10 (0.04, 0.28)                      | <.001                | 0.34 (0.12, 1.00)                    | 0.05                 |

HR: Hazard ratio; CI: Confidence intervals

<sup>a</sup> Unadjusted Cox regression models

<sup>b</sup> The second dose was administered  $\geq 5$  months before the follow-up starting date

<sup>c</sup> Multivariable Cox regression model, adjusted for the variables in the table and epidemiological week

**eTable 2: Associations of BNT162b2 Third Dose Vaccination With SARS-CoV-2 Infection, COVID-19 Hospitalizations, and Deaths >14 Days Following Vaccination Among Residents of Long-Term Care Facilities**

|                                               | Number of residents | Number of cases | Cumulative incidence | Unadjusted HR (95% CI) <sup>b</sup> | P-value <sup>b</sup> | Adjusted HR (95% CI) <sup>c</sup> | P-value <sup>c</sup> |
|-----------------------------------------------|---------------------|-----------------|----------------------|-------------------------------------|----------------------|-----------------------------------|----------------------|
| <b>RT-PCR confirmed SARS-CoV-2 infection</b>  |                     |                 |                      |                                     |                      |                                   |                      |
| Two doses of BNT162b2 vaccine <sup>a</sup>    | 2440                | 127             | 5.6%                 | 1.00                                | <.001                | 1.00                              | <.001                |
| Three doses of BNT162b2 vaccine               | 16,020              | 67              | 0.4%                 | 0.08 (0.05, 0.13)                   |                      | 0.09 (0.05, 0.14)                 |                      |
| <b>Mild/moderate COVID-19 hospitalization</b> |                     |                 |                      |                                     |                      |                                   |                      |
| Two doses of BNT162b2 vaccine <sup>a</sup>    | 2431                | 68              | 2.9%                 | 1.00                                | <.001                | 1.00                              | <.001                |
| Three doses of BNT162b2 vaccine               | 16,019              | 19              | 0.1%                 | 0.06 (0.03, 0.12)                   |                      | 0.05 (0.02, 0.11)                 |                      |
| <b>Severe COVID-19 hospitalization</b>        |                     |                 |                      |                                     |                      |                                   |                      |
| Two doses of BNT162b2 vaccine <sup>a</sup>    | 2440                | 44              | 1.9%                 | 1.00                                | <.001                | 1.00                              | <.001                |
| Three doses of BNT162b2 vaccine               | 16,020              | 9               | 0.1%                 | 0.06 (0.02, 0.16)                   |                      | 0.06 (0.02, 0.17)                 |                      |
| <b>COVID-19 related deaths<sup>d</sup></b>    |                     |                 |                      |                                     |                      |                                   |                      |
| Two doses of BNT162b2 vaccine <sup>a</sup>    | 2440                | 14              | 0.6%                 | 1.00                                | <.001                | 1.00                              | <.001 <sup>d</sup>   |
| Three doses of BNT162b2 vaccine               | 16,020              | 4               | 0.02%                | 0.04 (0.007, 0.19)                  |                      | 0.03 (0.006, 0.20) <sup>d</sup>   |                      |

<sup>a</sup> The second dose was administered  $\geq 5$  months before the follow-up start date

<sup>b</sup> Unadjusted Cox regression models

<sup>c</sup> Multivariable Cox regression model, adjusted for the variables age, sex, community-level socioeconomic status rank, population group, and epidemiological week

<sup>d</sup> Multivariable Cox regression model, adjusted for the variables age, sex, and epidemiological week

HR: hazard ratio; CI: confidence intervals
